# Supplementary material
Source: Springer Nature journal article supplement (http://www.springermedizin.de/resource/supplementary/13102_2012_8_MOESM4_ESM.pdf/9686396)

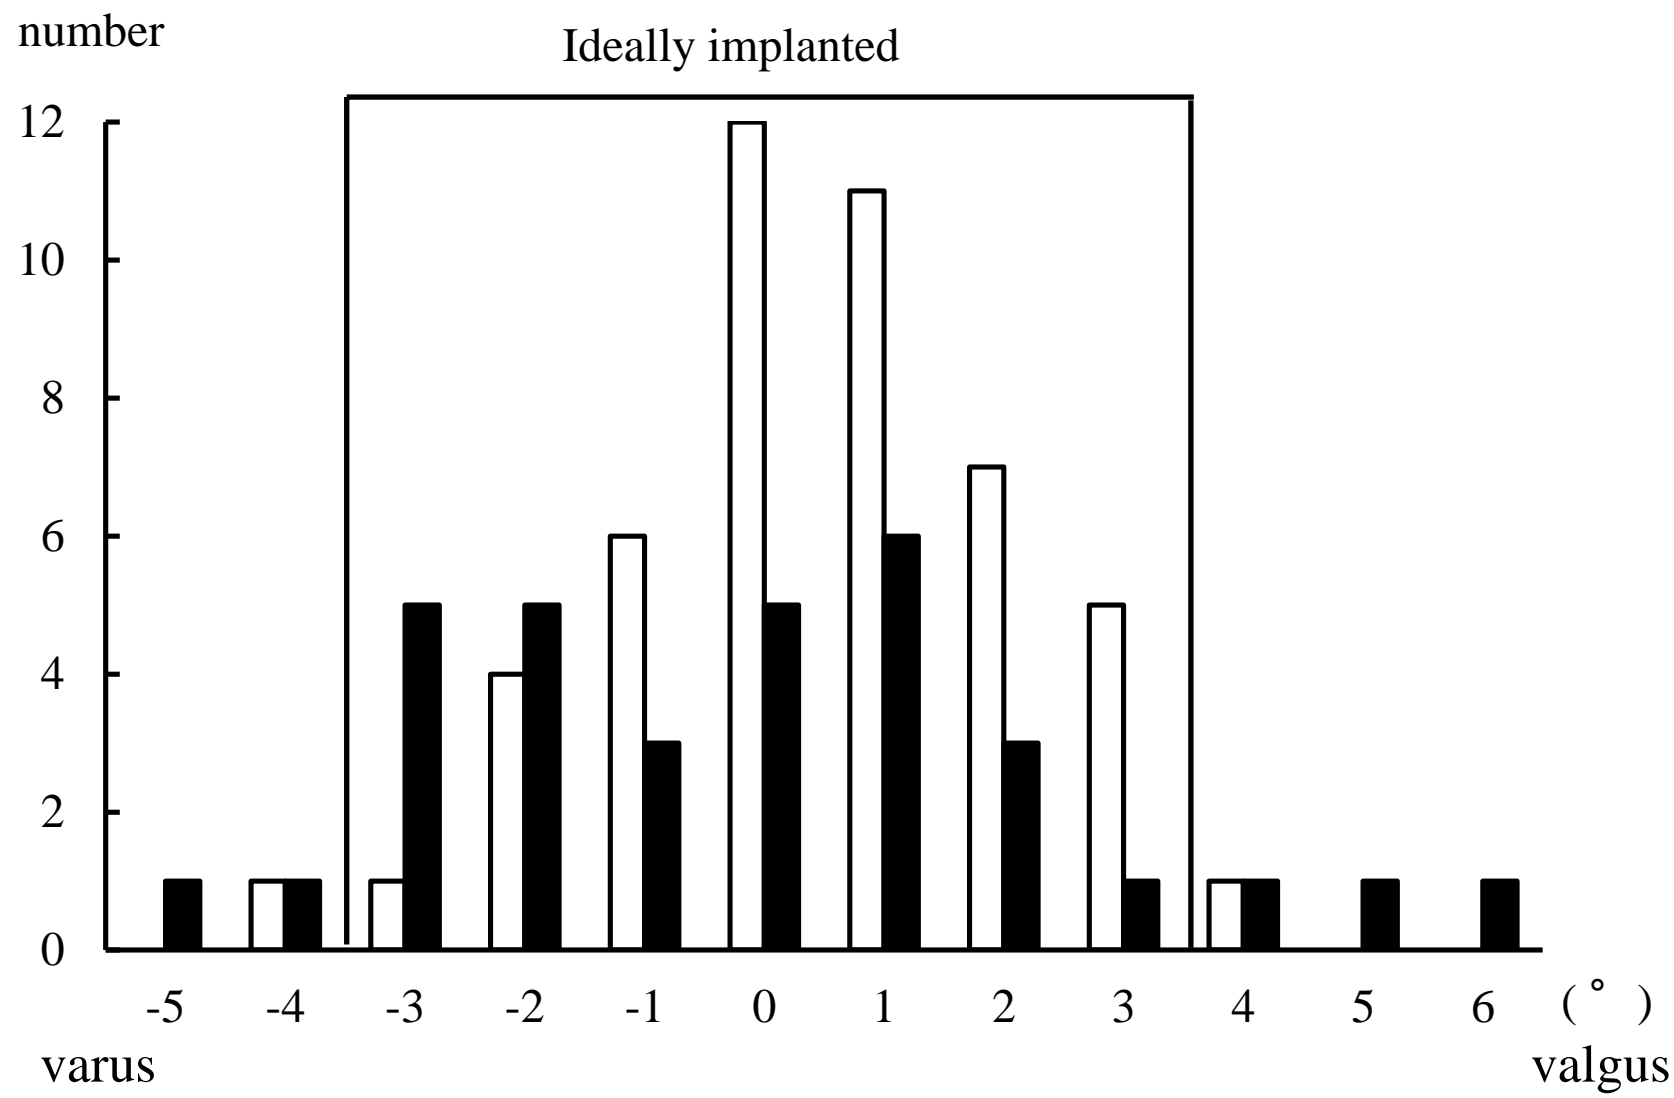

Supplement: MOESM4 [file 9686396]
